# Supplementary material for: Hydrothermal carbonization of activated sewage sludge over ammonia-treated Fenton sludge to produce hydrochar for clean fuel use
Source: Royal Society of Chemistry journal article supplement (doi:10.1039/d0gc01701a), 2020-01-01
Supplement: d0gc01701a1.pdf [file d0gc01701a1.pdf]

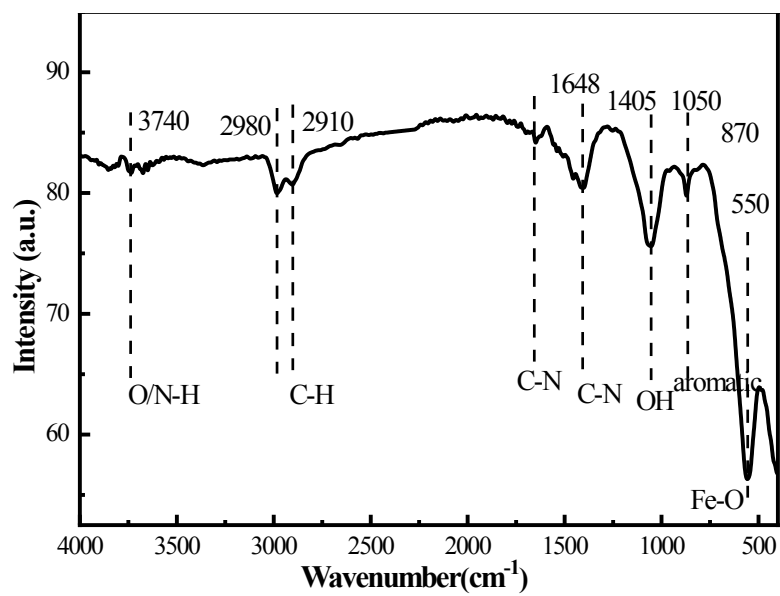

**Figure S1** The FTIR result of ATFS.

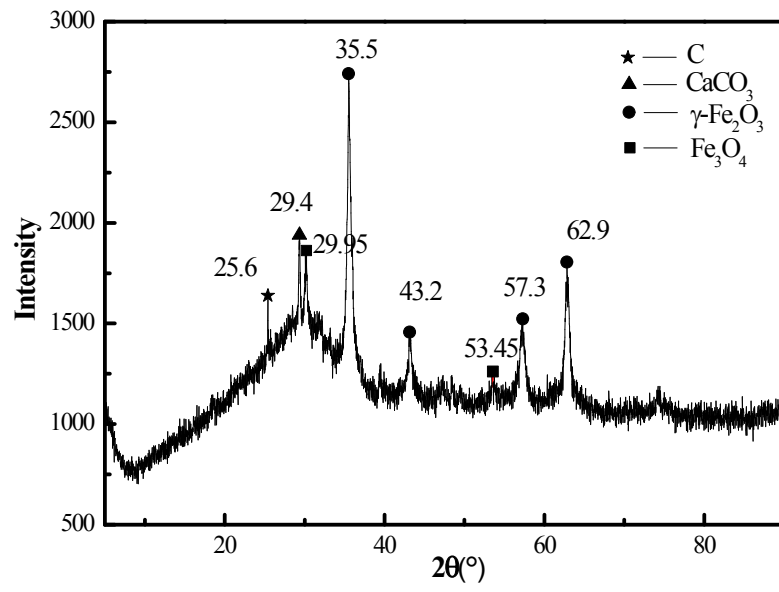

**Figure S2** XRD results of ATFS.

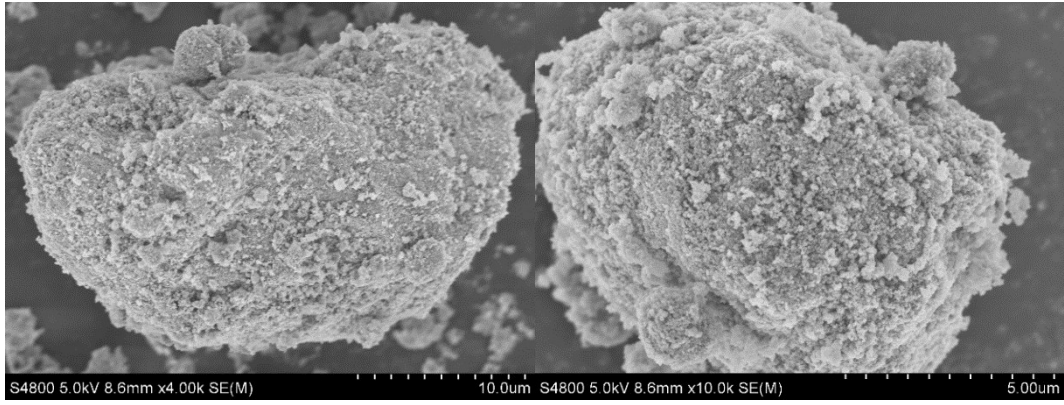

**Figure S3** SEM results of ATFS.

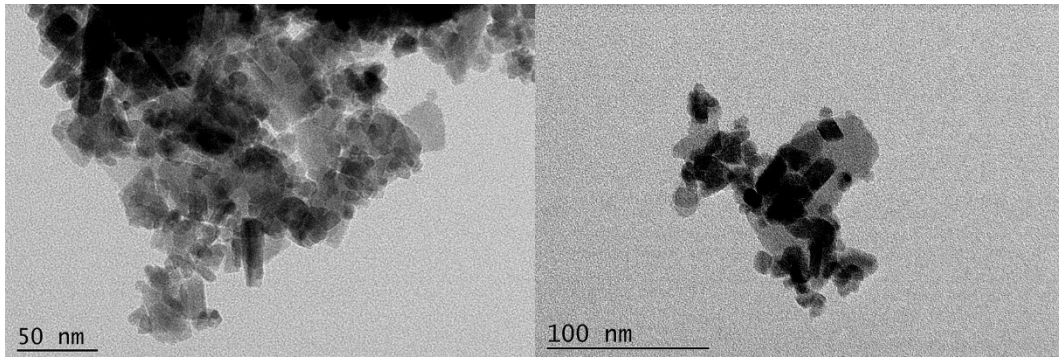

**Figure S4** TEM results of ATFS.

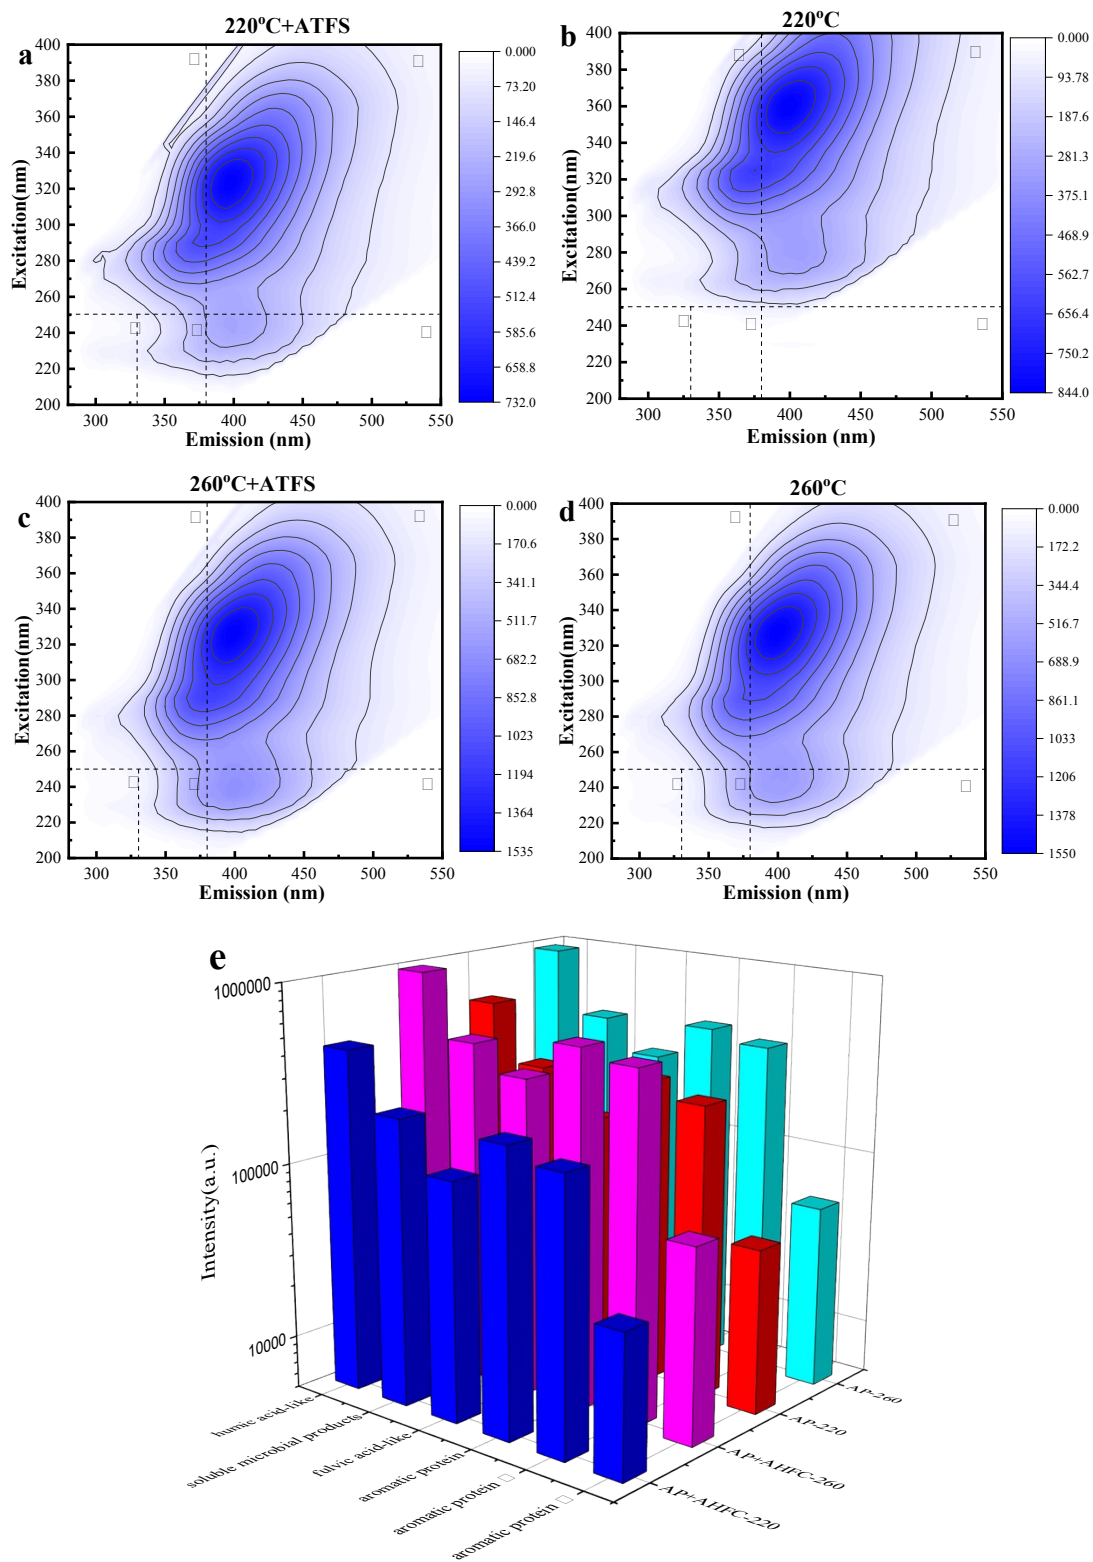

**Figure S5** EEMs of the aqueous phase produced with and without AHFC at different temperatures (a: 200°C with ATFS; b: 200°C without AHFC; c: 260°C with ATFS; d: 260°C without ATFS; and e: intensity of proteins in the aqueous phase).
